# Supplementary material for: Mercury uptake by Paspalum distichum L. in relation to the mercury distribution pattern in rhizosphere soil
Source: Research Square preprint supplement (doi:10.21203/rs.3.rs-189029/v1), 2021-06-21
Supplement: Supplementary file 1 [file 9a3f0b08e7f0da617175fc3b.docx]

# Mercury uptake by *Paspalum distichum* L in relation to the mercury distribution pattern in rhizosphere soil

Su Xu1, Ping Gong1#, Wen Ding1, Shengchun Wu1,2, Xinwei Yu3**, Peng Liang1,2*

1School of Environmental and Resource Sciences, Zhejiang A&F University, Lin’an, Zhejiang Province 311300, China

2Key Laboratory of Soil Contamination Bioremediation of Zhejiang Province, Zhejiang A&F University, Lin’an, Zhejiang Province 311300, China

3Key Laboratory of Health Risk Factors for Seafood of Zhejiang Province, Zhoushan Municipal

Center for Disease Control and Prevention, Zhoushan 316021, China

*Corresponding author. E-mail: liangpeng@zafu.edu.cn (Peng Liang); tel.: +86-571-58602246; fax: +86-571-63740889

**Co-Corresponding author. E-mail: xwyu0716@163.com (Xinwei Yu); tel.: +86-580-2080950; fax: +86-580-2080950


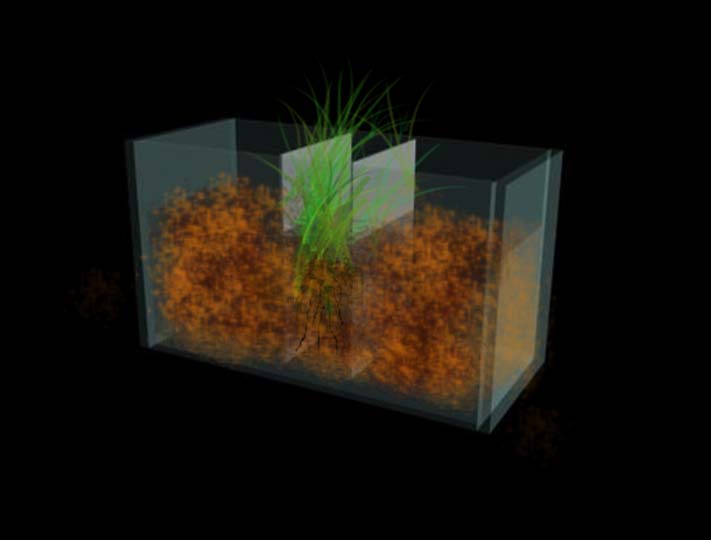


Fig. S1 Structure of rhizosphere box

Fig. S2 Chemical fraction of Hg in two kinds of soil (A:GXS; B HZS)

Fig. S3 Soil pH value during the sampling period with five horizontal distribution gradients in two kinds of soil. (A: GXS; B: HZS)

Fig. S4 Soil DOC concentrations during the sampling period with five horizontal distribution gradients in two kinds of soil. (A: GXS; B: HZS)
